# Supplementary material
Source: PubMed Central journal article supplement (PMC2077057)
Supplement: pnas_0708467104_3.pdf [file pnas_0708467104_3.pdf]

**Experiment One: Can LMMS suppress adiposity in the normal mouse?**

Male C57BL/6J; n=20 in each group.  
LMMS began at 7w of age. Scanned at 12w (19w of age).  
LMMS Duration: 15w (22w of age).

**Experiment Two: Can LMMS suppress the differentiation of MSCs into adipocytes?**

Male C57BL/6J; n=8 in each group. LMMS began at 9w of age.  
LMMS Duration: 6w (15w of age).

**Experiment Three: Can LMMS suppress adiposity in an animal model that recapitulates age-related changes in body composition?**

Female C3H.B6-6T; n=8 in each group. LMMS began at 7w of age.  
LMMS Duration: 9w (16w of age).

*In vivo* scans performed at twelve weeks

*In vivo* scans performed at nine weeks

0 2 4 6 8 10 12 14 16

Weeks of LMMS
