# Supplementary material
Source: PubMed Central journal article supplement (PMC2077057)

Control B6

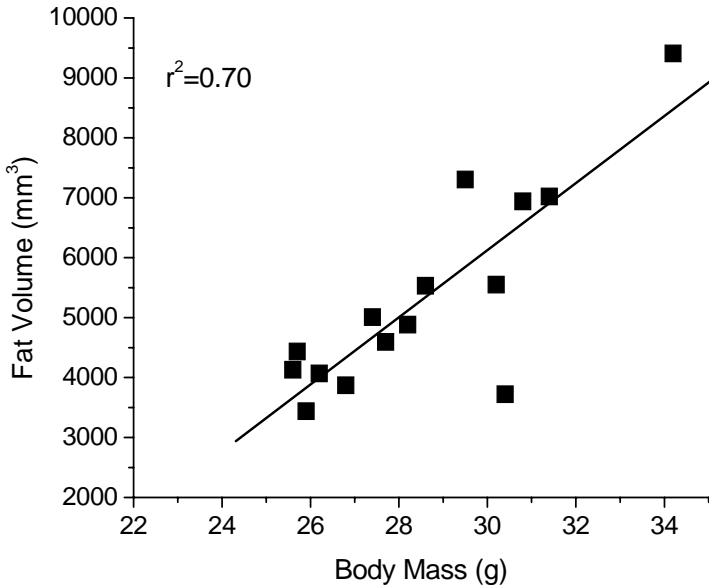

LMMS B6

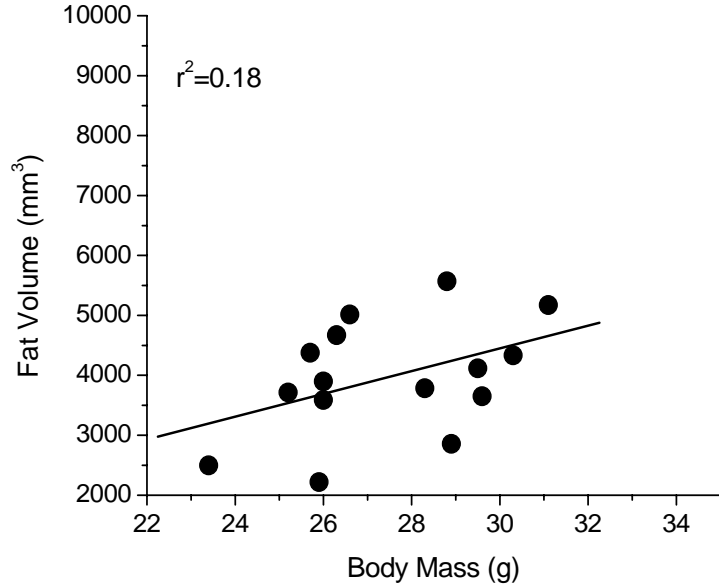

Supplement: pnas_0708467104_1.pdf [file pnas_0708467104_1.pdf]

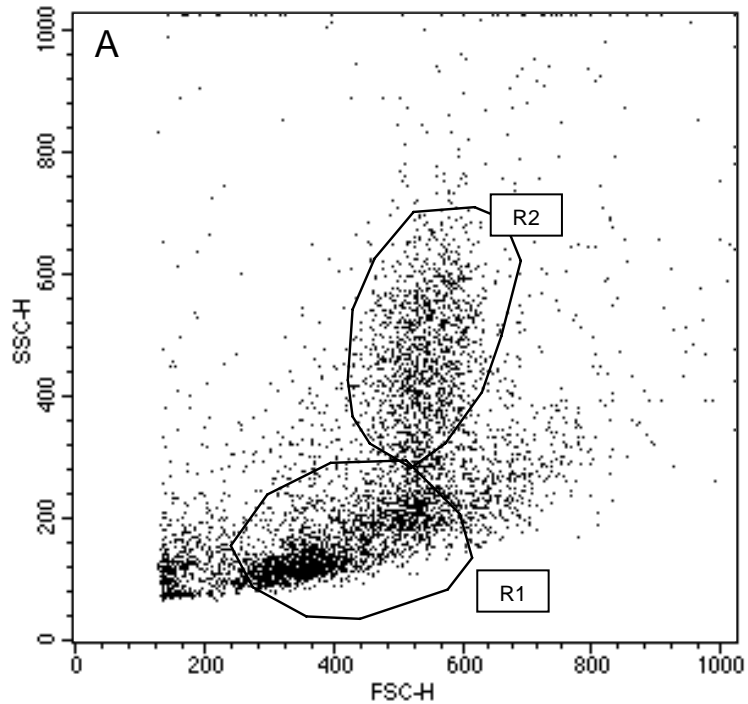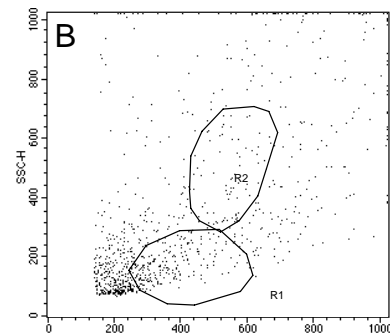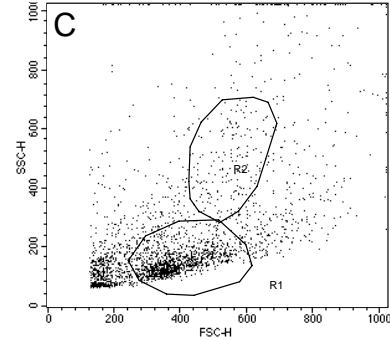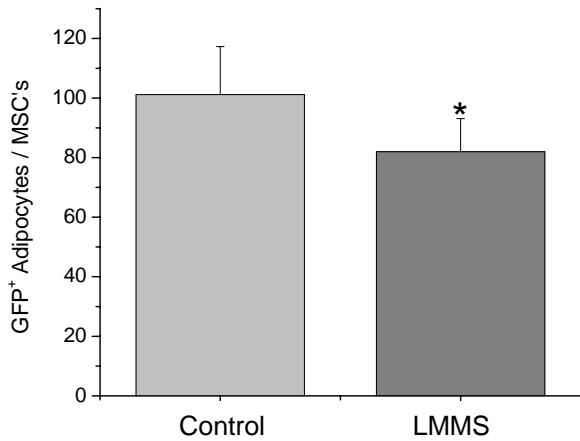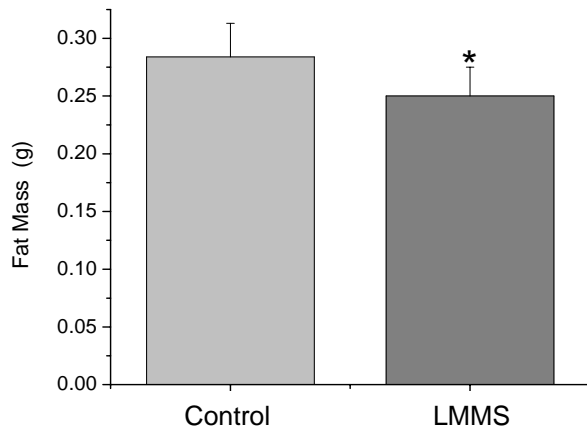

Supplement: pnas_0708467104_2.pdf [file pnas_0708467104_2.pdf]
